# Supplementary material for: Formation mechanism of MnxCo3−xO4 yolk–shell structures
Source: Royal Society of Chemistry journal article supplement (doi:10.1039/d1ra04996h), 2021-01-01
Supplement: d1ra04996h1.pdf [file d1ra04996h1.pdf]

## Supporting Information

### Formation Mechanism of $Mn_xCo_{3-x}O_4$ Yolk-shell Structures

Chang-Yang Chiang and Wuzong Zhou

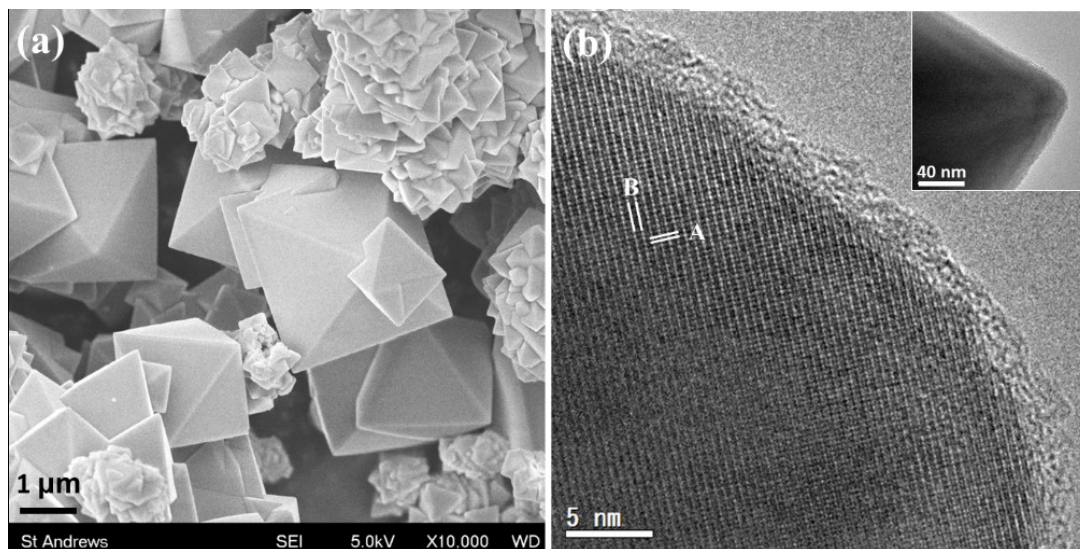

**Fig. S1** (a) SEM image of specimen Mn(3-24), showing octahedral crystals of  $Mn_2O_3$ . (b) HRTEM image of an octahedral particle with the lattice fringes being indexed to the cubic  $Mn_2O_3$  unit cell,  $d_A = d_{200} = 4.75 \text{ \AA}$  and  $d_B = d_{013} = 2.96 \text{ \AA}$  with the interplane angle of  $90^\circ$ . The inset is the corresponding TEM image at a low magnification.

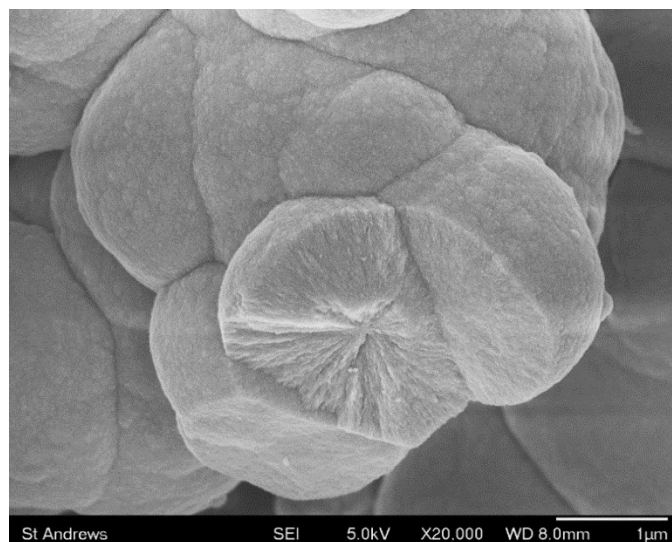

**Fig. S2** High resolution SEM image of Mn(0-24). The broken spheres show the dense and polycrystalline cores.

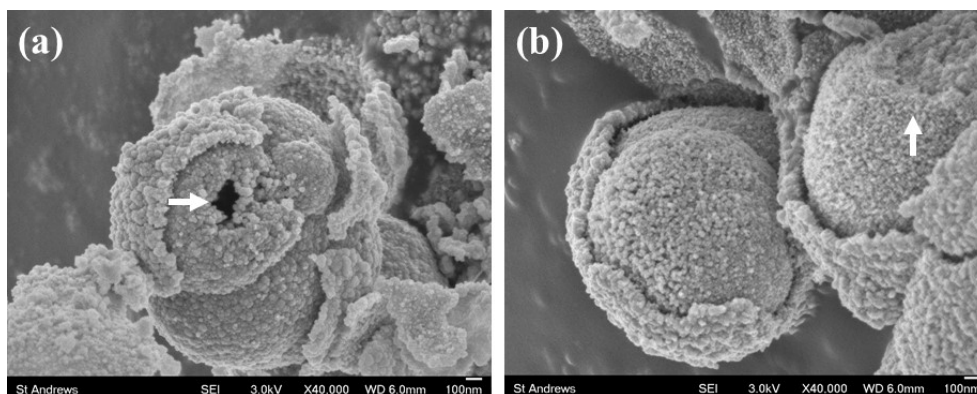

**Fig. S3** High resolution SEM images recorded from Mn(2-24). The arrows indicate (a) hollow and (b) solid cores.

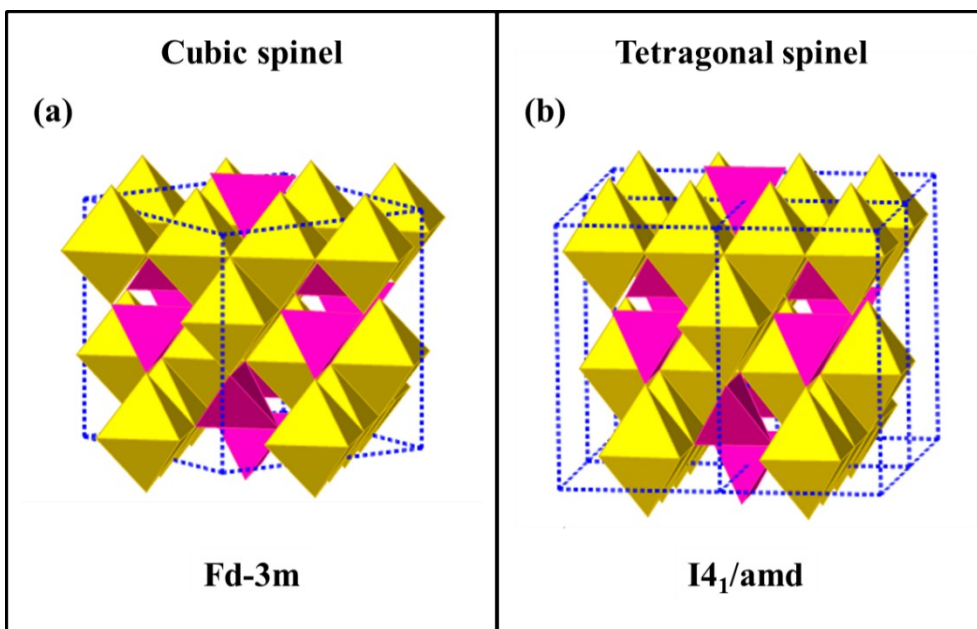

**Fig. S4** A diagram showing the relationship between (a) the cubic and (b) the tetragonal spinel structures via the polyhedral models. The unit cells are represented by the dotted lines.

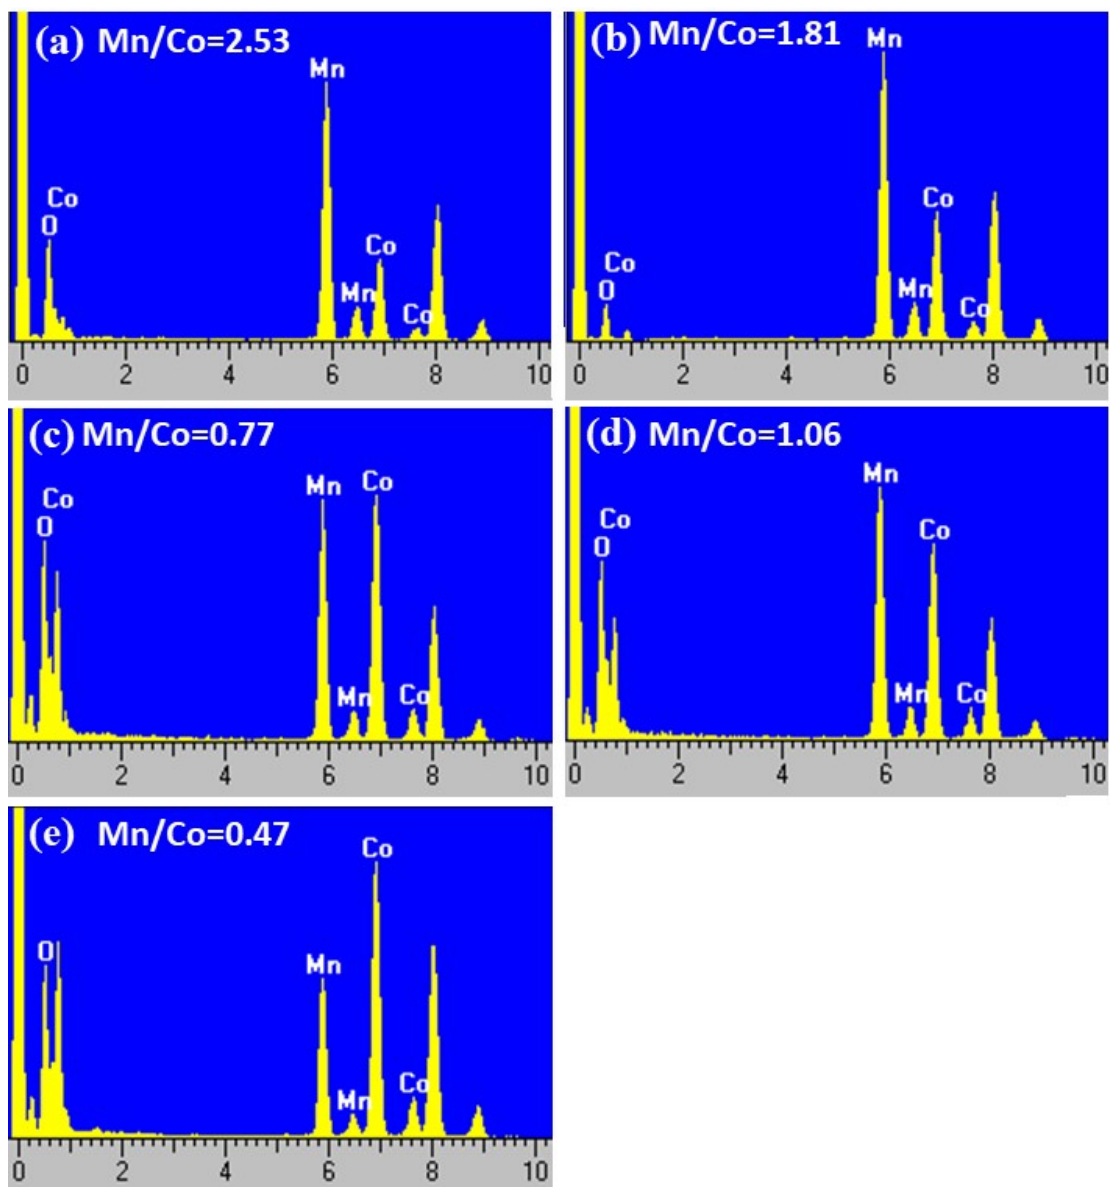

**Fig. S5**  
Some typical EDX

spectra from (a) a core and (b) a shell of a hollow yolk-shell microsphere in Mn(2-24), (c) a core and (d) a shell of a solid yolk-shell microsphere in Mn(1.5-24), (e) a shell-free microsphere in Mn(1-24).

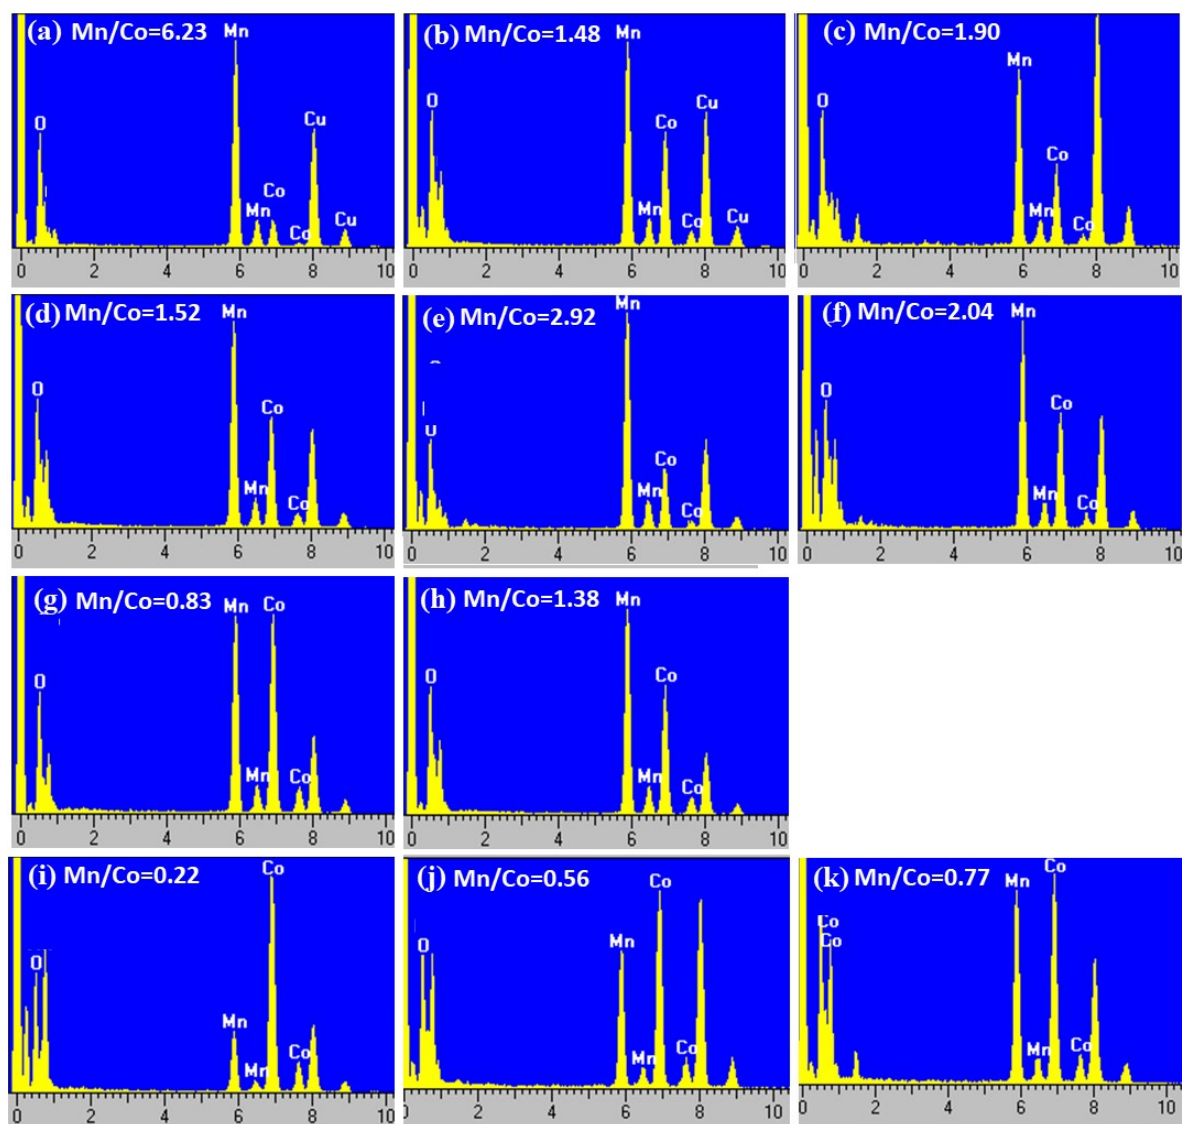

**Fig. S6** EDX spectra from specimens at early stages of the crystal growth. (a) Nanosheets and (b) small particles in Mn(2-0.5). (c) Nanosheets and (d) growing particles in Mn(2-1). (e) Core and (f) shell of hollow yolk-shell spheres in Mn(2-2). (g) Core and (h) shell of solid yolk-shell spheres in Mn(2-2). (i) Small particles in Mn(1-0.5). (j) Medium sized particles and (k) large particles in Mn(1-1).

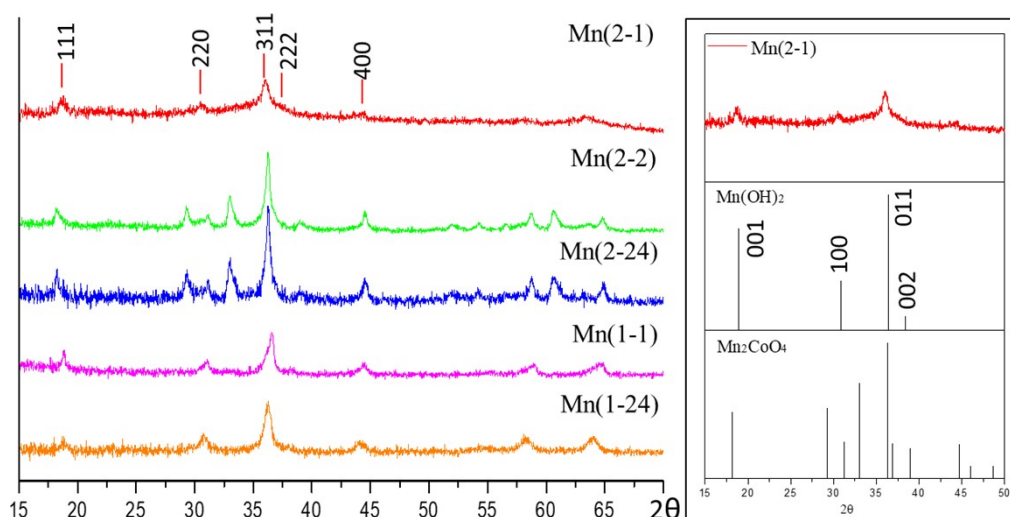

| Mn(OH) <sub>2</sub> |      |           | Mn <sub>x</sub> Co <sub>3-x</sub> O <sub>4</sub> |           |
|---------------------|------|-----------|--------------------------------------------------|-----------|
| <i>hkl</i>          | 2θ   | d-spacing | <i>hkl</i>                                       | d-spacing |
| 001                 | 18.7 | 4.689     | 111                                              | 4.694     |
| 100                 | 31.1 | 2.899     | 220                                              | 2.874     |
| 011                 | 36.5 | 2.466     | 311                                              | 2.451     |
| 002                 | 38.0 | 2.345     | 222                                              | 2.347     |
|                     |      |           | 400                                              | 2.033     |

**Fig. S7** XRD patterns of samples with short reaction times. The pattern of Mn(2-1) is indexed to a cubic spinel unit cell. The right picture shows a comparison of the pattern Mn(2-1) with the standard pattern of hexagonal unit cell of Mn(OH)<sub>2</sub>. The table shows a comparison of the *d*-spacings of hexagonal Mn(OH)<sub>2</sub> with *a* = 3.347 and *c* = 4.689 Å and cubic Mn<sub>x</sub>Co<sub>3-x</sub>O<sub>4</sub> with *a* = 8.130 Å.

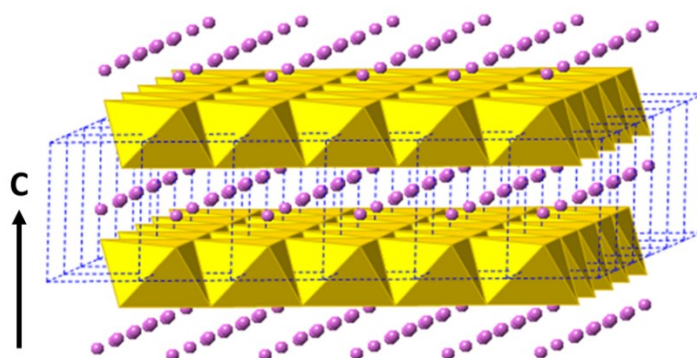

**Fig. S8** The crystal structure of Mn(OH)<sub>2</sub> represented by the MnO<sub>6</sub> octahedra (yellow) and the hydrogen atom (pink). The layers, composed of edge-sharing octahedra, can bind to each other by the Van der Waals forces.
